# Supplementary material
Source: PubMed Central journal article supplement (PMC1635080)

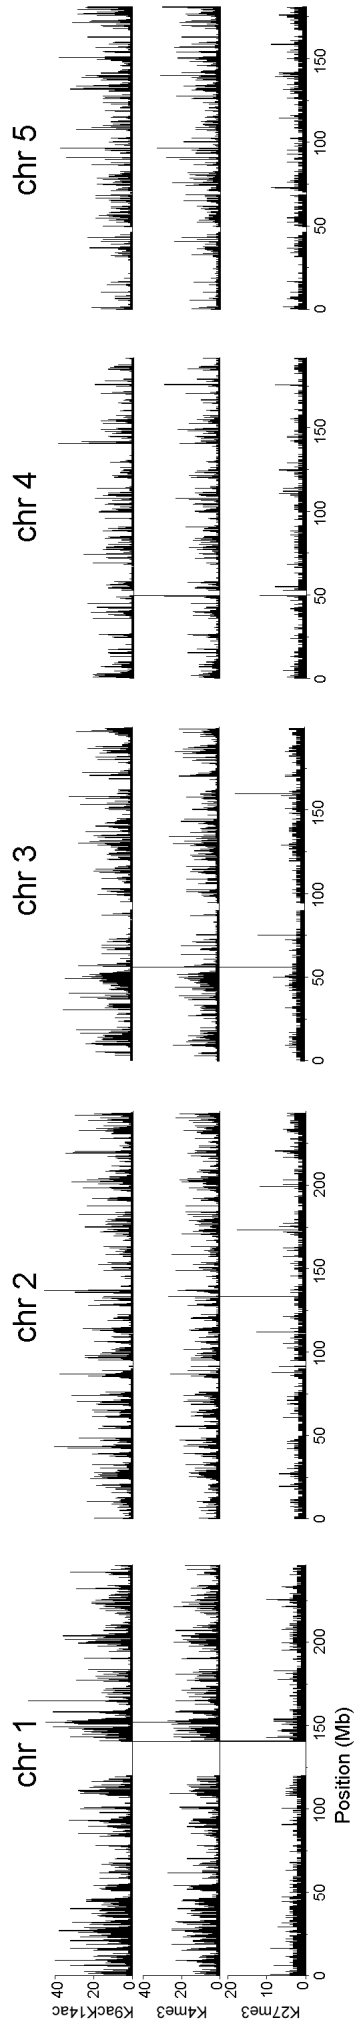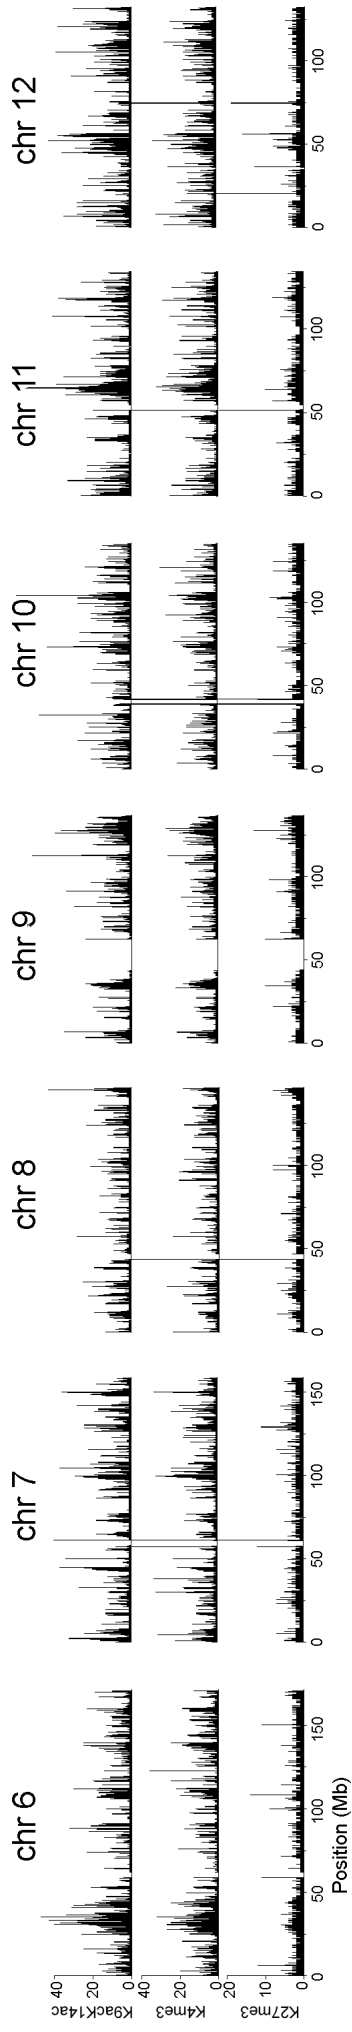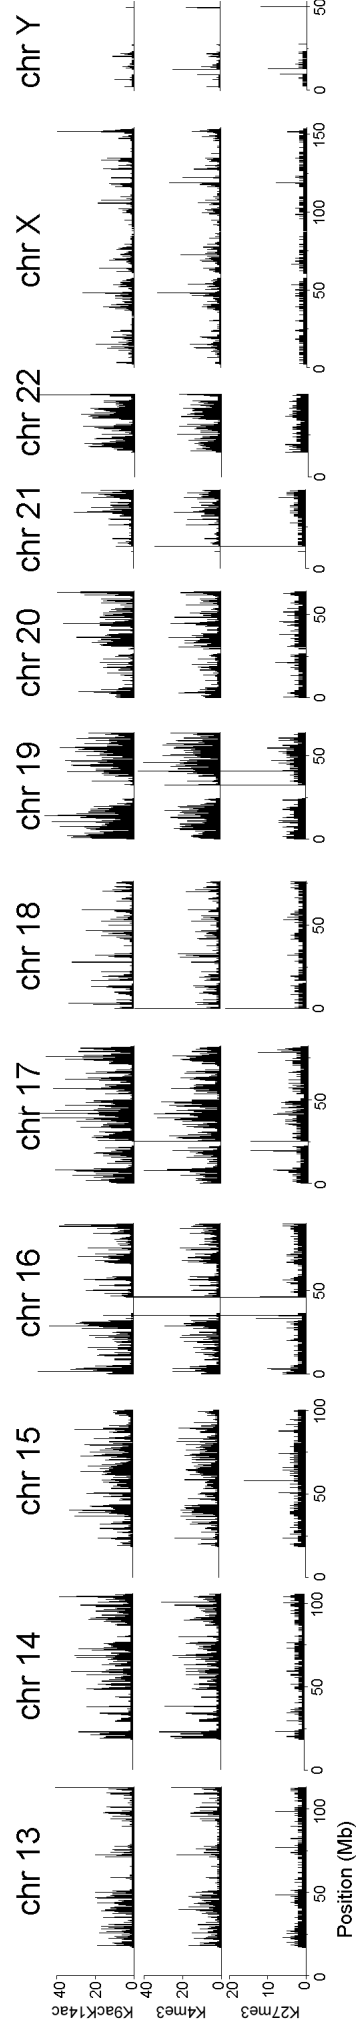

Supplement: pnas_0607617103_1.pdf [file pnas_0607617103_1.pdf]

A

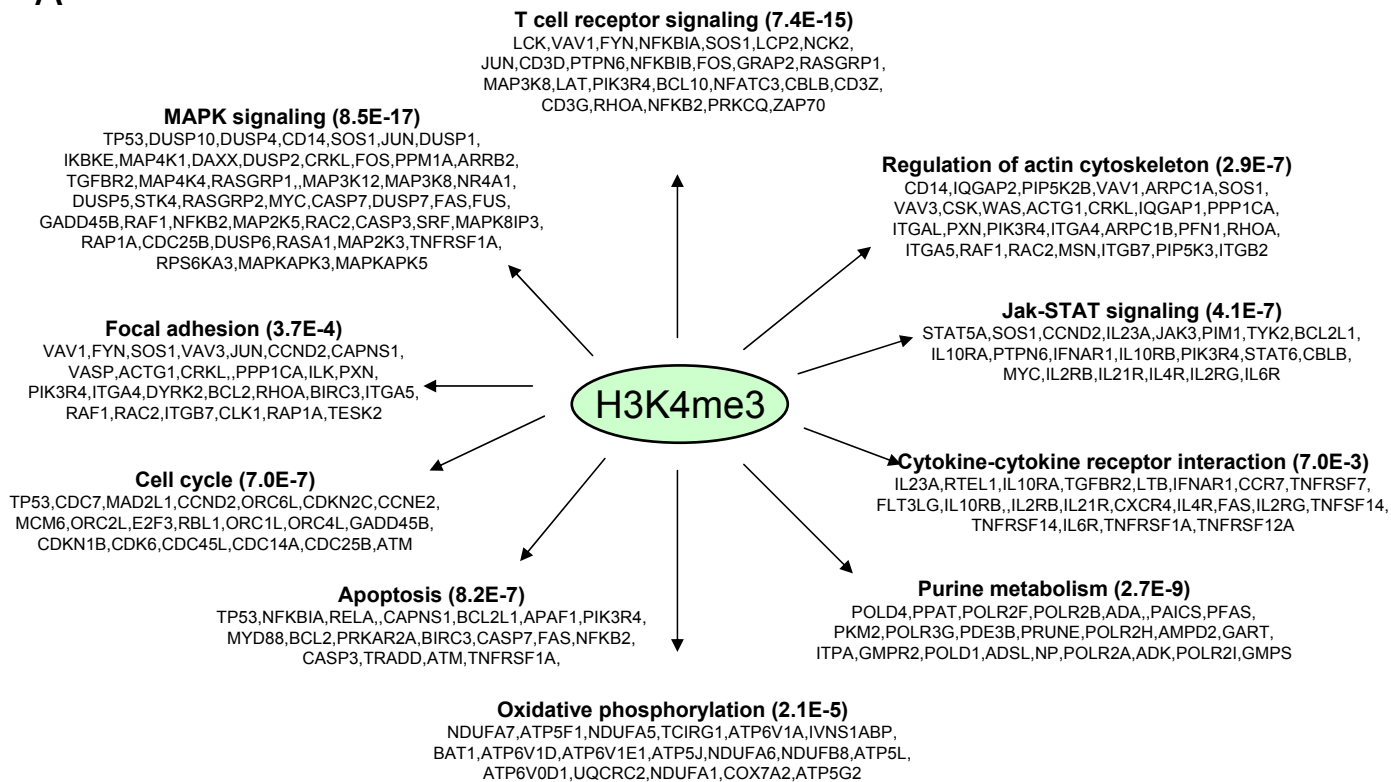

B

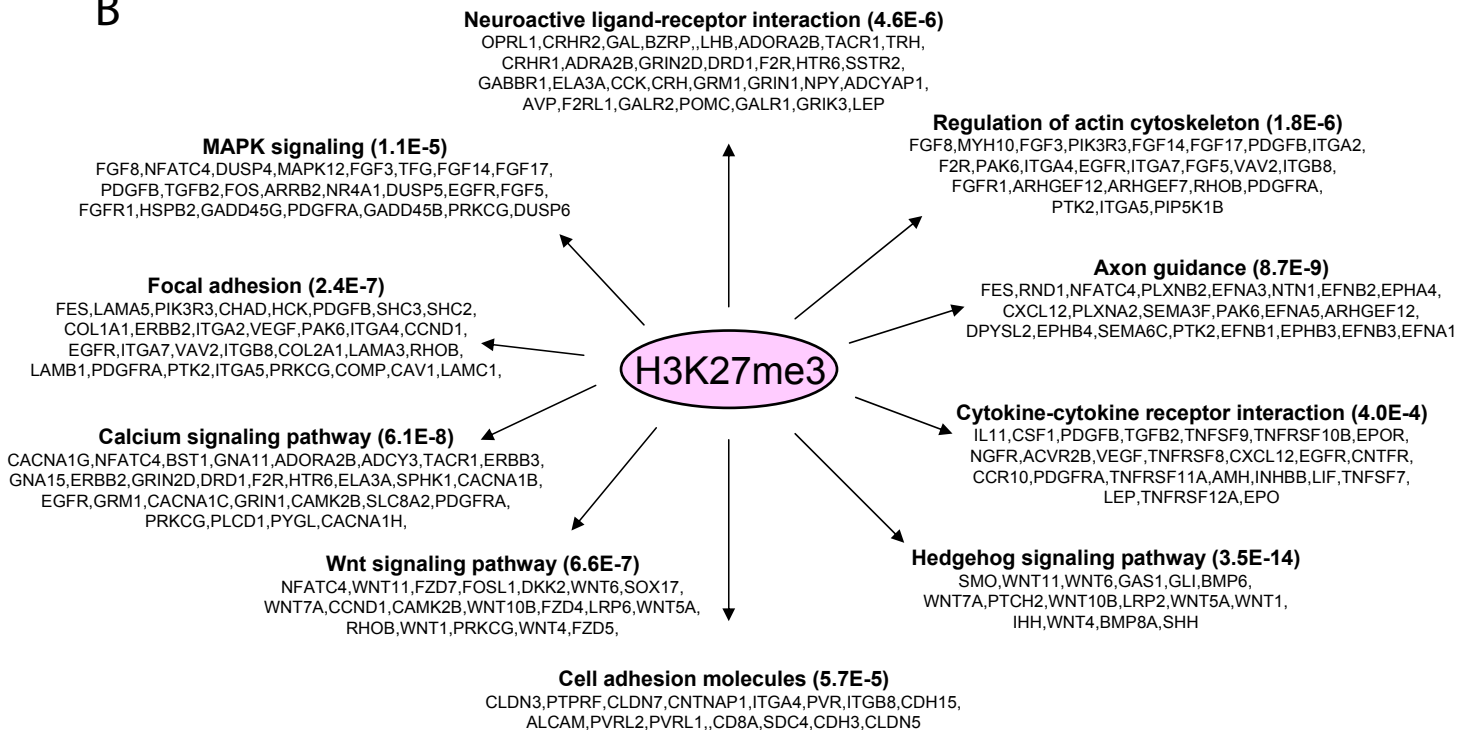

Supplement: pnas_0607617103_2.pdf [file pnas_0607617103_2.pdf]
